# Supplementary material for: Chemical Constituents from the Roots of Polygala arillata and Their Anti-Inflammatory Activities
Source: Hindawi journal article supplement (doi:10.1155/2019/8079619), 2019-01-02
Supplement: f1 [file 8079619.f1.pdf]

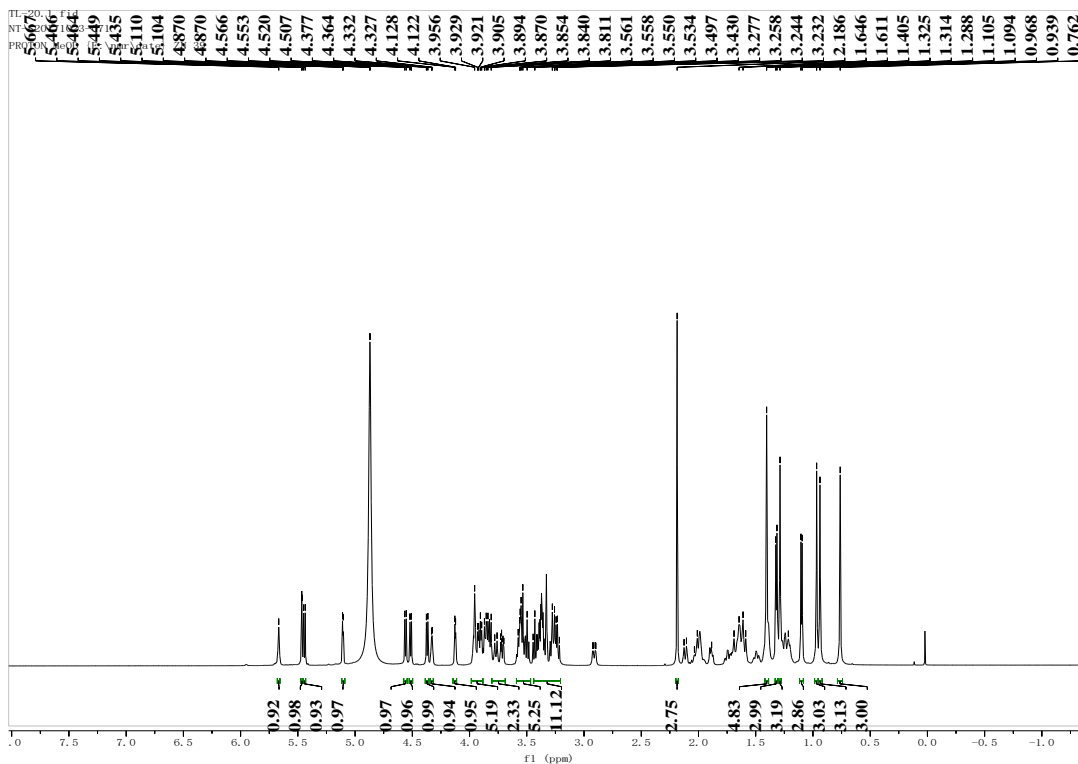

Fig. S1. The  $^1\text{H}$ -NMR spectrum of compound 1.

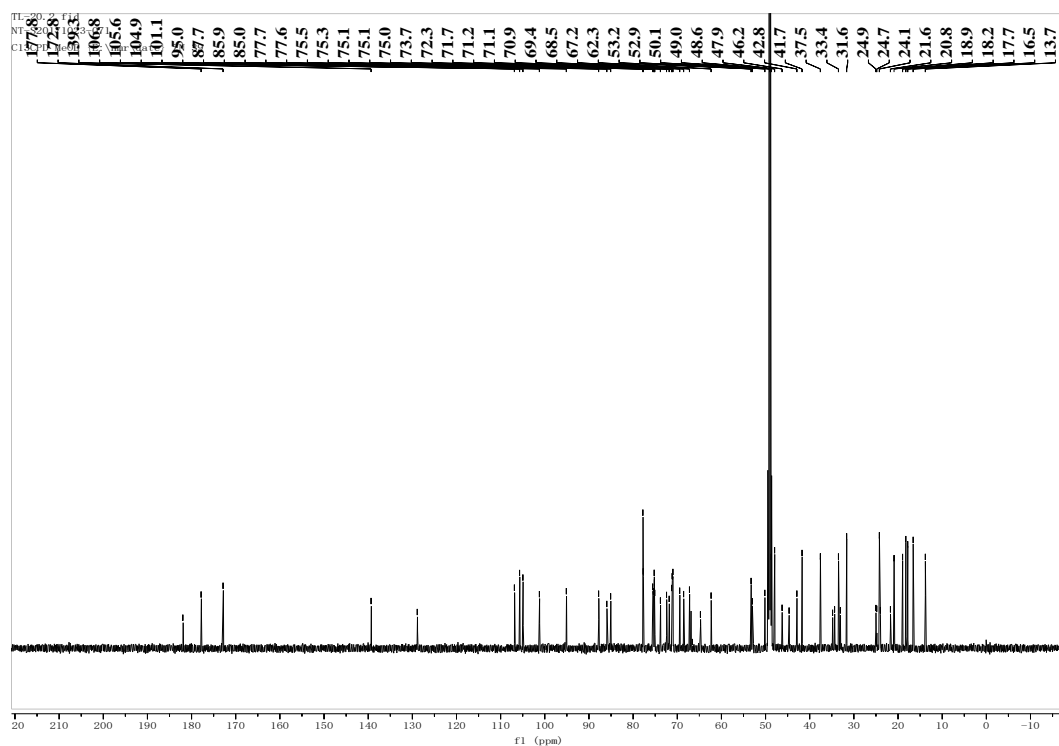

Fig. S2. The  $^{13}\text{C}$ -NMR spectrum of compound 1.

Fig.

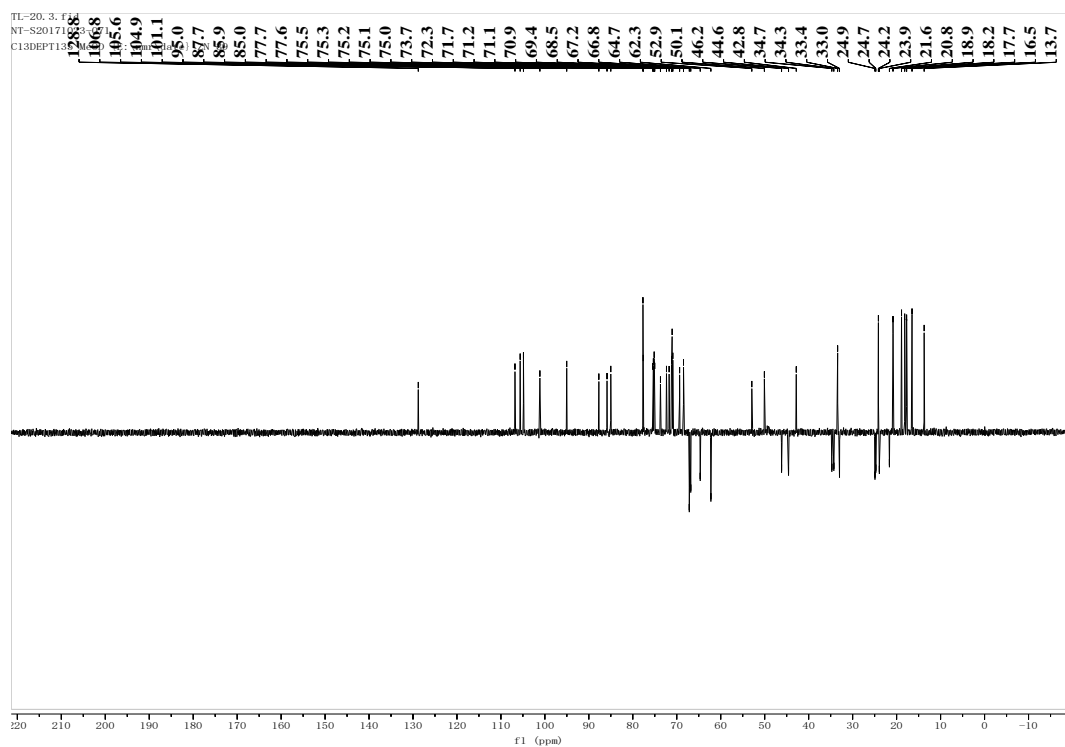

**Fig.**

**Fig. S3.** The DEPT-135 spectrum of compound **1**.

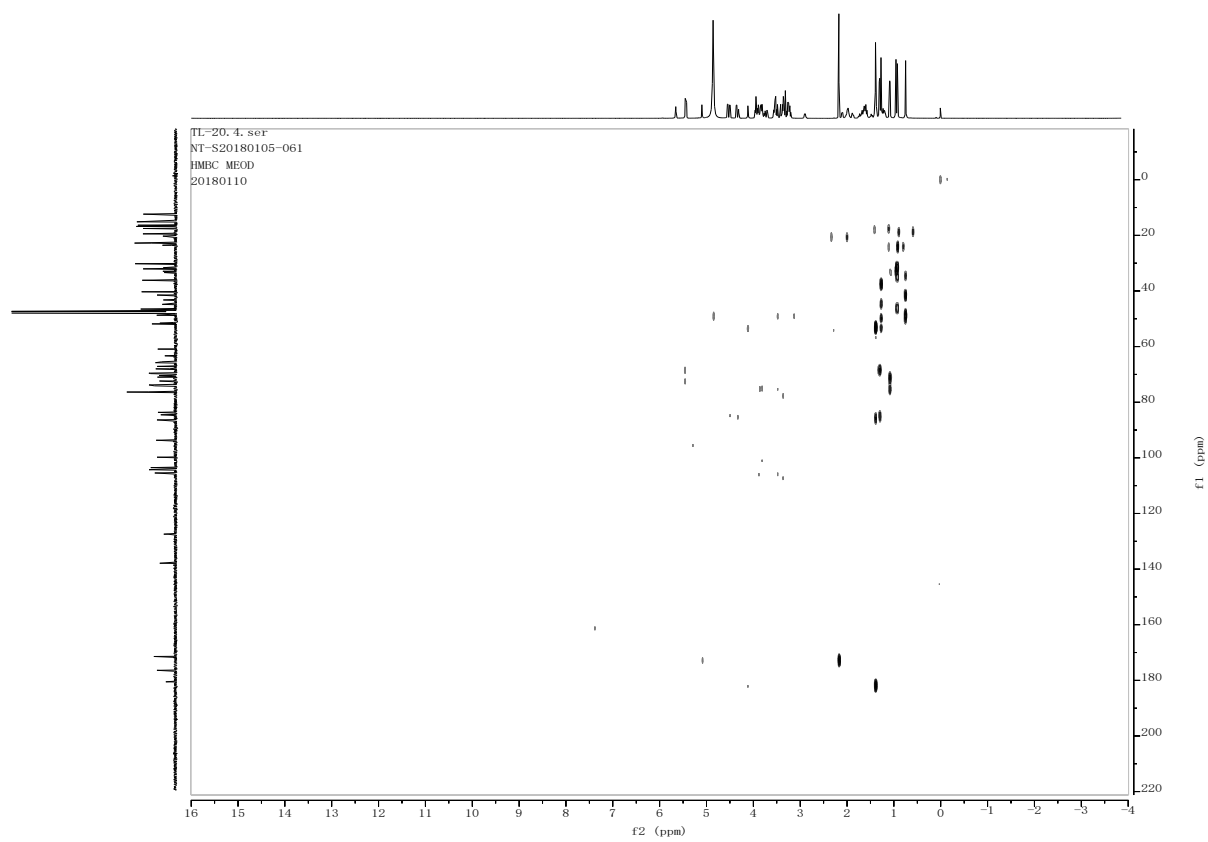

**Fig. S4.** The HMBC spectrum of compound **1**.

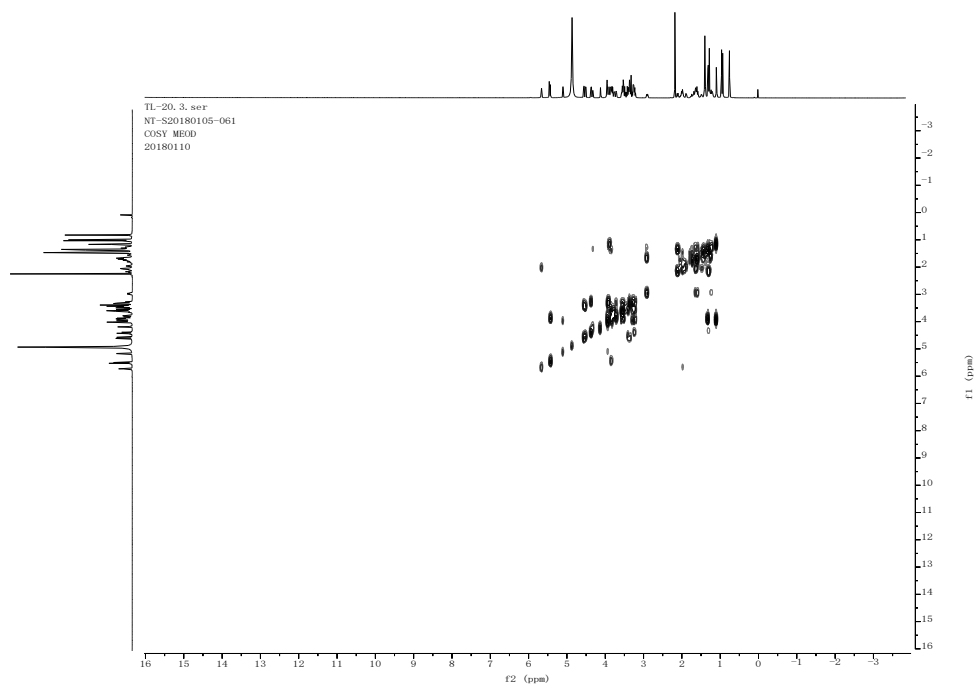

**Fig. S5.**

The  $^1\text{H}$ - $^1\text{H}$  COSY spectrum of compound **1**.

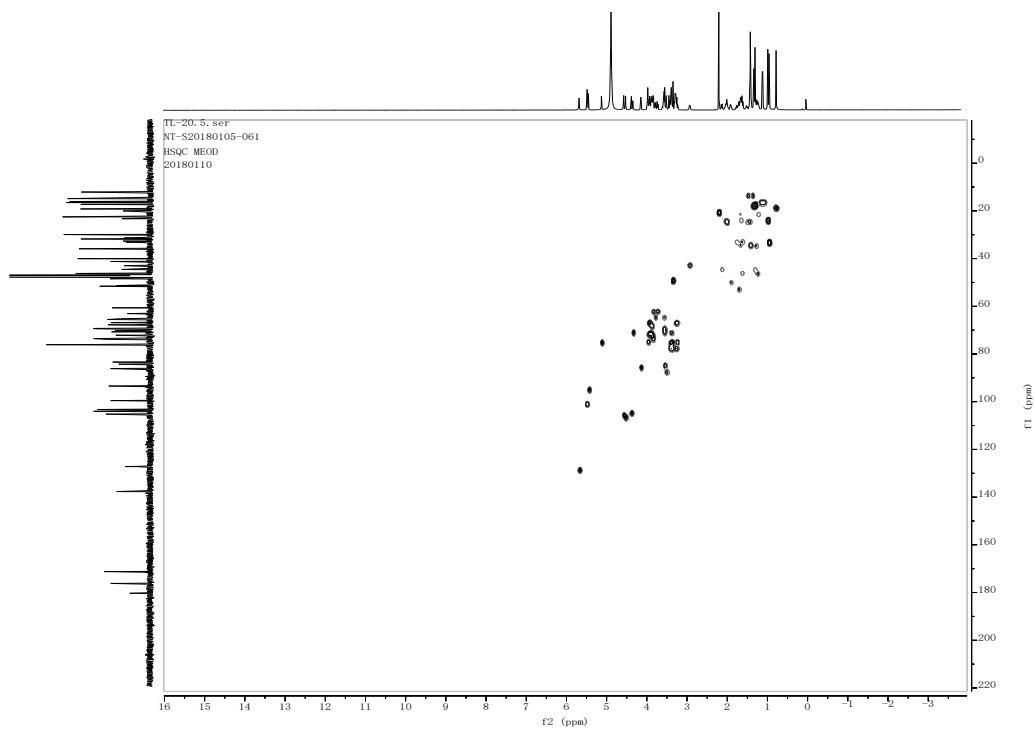

**Fig.**

**S6.** The HSQC spectrum of compound **1**.

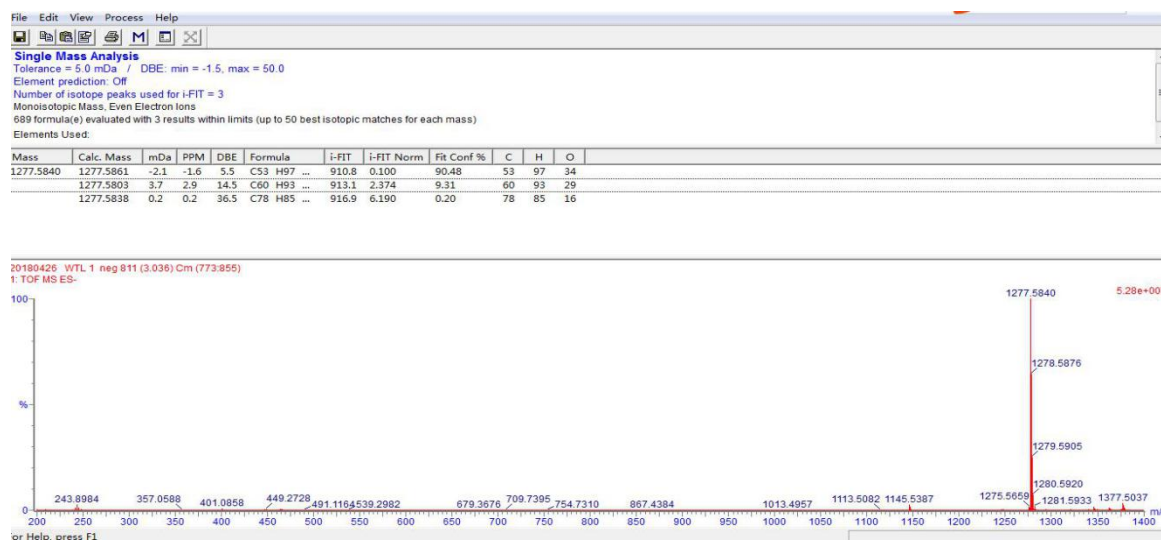

Fig. S7. The HR-ESI-MS spectrum of compound 1.

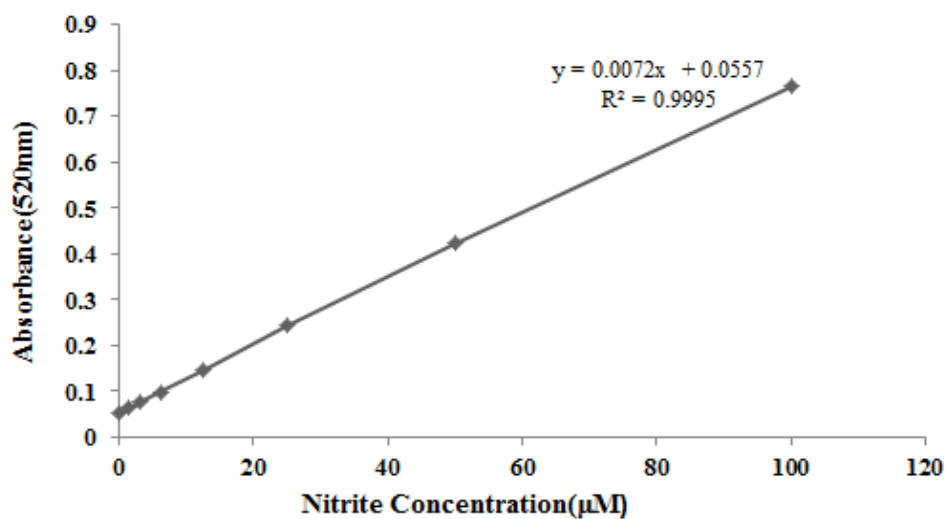

Fig. S8. The standard reference curve of sodium nitrite.
